# Supplementary material for: Clinical Translation of Long-Acting Drug Delivery Systems for Posterior Capsule Opacification Prophylaxis
Source: MDPI journal article supplement (doi:10.3390/pharmaceutics15041235), 2023-04-13
Supplement: s1 [file s1]

## Supplementary Materials

# Clinical Translation of Long-Acting Drug Delivery Systems for Posterior Capsule Opacification Prophylaxis

Xinyang Li <sup>1</sup>, Chen Liang <sup>1</sup>, Yexuan Guo <sup>2</sup>, Jing Su <sup>2</sup>, Xi Chen <sup>1</sup>, Robert B. Macgregor, Jr. <sup>3</sup>, Rui Xue Zhang <sup>2,\*</sup> and Hong Yan <sup>1,2,\*</sup>

<sup>1</sup> Xi'an People's Hospital (Xi'an Fourth Hospital), Shaanxi Eye Hospital, Affiliated People's Hospital of Northwest University, 21 Jiefang Road, Xi'an 710004, China

<sup>2</sup> Xi'an Key Laboratory of Stem Cell and Regenerative Medicine, Institute of Medical Research, Northwestern Polytechnical University, 127 West Youyi Road, Xi'an 710072, China

<sup>3</sup> Department of Pharmaceutical Sciences, Leslie Dan Faculty of Pharmacy, University of Toronto, 144 College Street, Toronto, ON M5S 3M2, Canada

\* Correspondence: zhangruixue@nwpu.edu.cn (R.X.Z.); yan2128ts@med.nwu.edu.cn (H.Y.); Tel.: +86-17792282109 (R.X.Z. & H.Y.); Fax: +86-029-88460875 (R.X.Z. & H.Y.)

**Table S1. Query search of published literatures for ocular drug delivery system for anterior segment diseases in Web of Science Core Collection**

| Searching Step | Searching Topic <sup>a</sup>                     |
|----------------|--------------------------------------------------|
| 1              | nanomedicine                                     |
| 2              | nanoparticle                                     |
| 3              | nanodevice                                       |
| 4              | drug delivery system                             |
| 5              | intraocular lens                                 |
| 6              | IOL                                              |
| 7              | combine 1 OR 2 OR 3 OR 4 OR 5 OR 6               |
| 8              | publication date range “2008-2022”               |
| 9              | document types as “article” and “review article” |
| 10             | anterior segment disease                         |
| 11             | cataract-related disorder                        |
| 12             | cataract                                         |
| 13             | corneal disease                                  |
| 14             | combine 10 OR 11 OR 12 OR 13                     |

|    |                                                  |
|----|--------------------------------------------------|
| 15 | publication date range “2008-2022”               |
| 16 | document types as “article” and “review article” |
| 17 | combine 9 AND 16                                 |

<sup>a</sup> Topic term within a record include title, abstract, author keywords, keywords Plus<sup>®</sup>

**Table S2. Query search of published literatures for posterior capsule opacification (PCO) in Web of Science Core Collection.**

| Searching Step | Searching Topic <sup>a</sup>                     |
|----------------|--------------------------------------------------|
| 1              | posterior capsular opacification                 |
| 2              | posterior capsule opacification                  |
| 3              | PCO                                              |
| 4              | combine 1 OR 2 OR 3                              |
| 5              | publication date range “2008-2022”               |
| 6              | document types as “article” and “review article” |

<sup>a</sup> Topic term within a record include title, abstract, author keywords, keywords Plus<sup>®</sup>

**Table S3. Query search of published literatures for drug delivery system for PCO in Web of Science Core Collection**

| Searching Step | Searching Topic <sup>a</sup>                     |
|----------------|--------------------------------------------------|
| 1              | posterior capsular opacification                 |
| 2              | posterior capsule opacification                  |
| 3              | PCO                                              |
| 4              | combine 1 OR 2 OR 3                              |
| 5              | publication date range “2008-2022”               |
| 6              | document types as “article” and “review article” |
| 7              | nanomedicine                                     |
| 8              | nanoparticle                                     |
| 9              | nanodevice                                       |

|    |                                                  |
|----|--------------------------------------------------|
| 10 | drug delivery system                             |
| 11 | intraocular lens                                 |
| 12 | IOL                                              |
| 13 | combine 7 OR 8 OR 9 OR 10 OR 11 OR 12            |
| 14 | publication date range “2008-2022”               |
| 15 | document types as “article” and “review article” |
| 16 | combine 6 AND 15                                 |

<sup>a</sup> Topic term within a record include title, abstract, author keywords, keywords Plus<sup>®</sup>

The drug release profile of DDS in each reference (**Table S4**) was selected if it was applied *in vivo*. Firstly, individual data points corresponding to the drug release cumulative time (t) in *x-axis* and the fraction (%) of drug released in time t (F) in *y-axis* were acquired by Getdata software. To assess the goodness of fit of a model for fitting drug release profiles, statistical criteria including the correlation coefficient ( $R^2$ ), the coefficient of determination ( $R^2_{\text{adjusted}}$ ), the mean square error (MSE), the Akaike Information Criterion (AIC) and the Model Selection Criterion (MSC) were determined by the program DDSolver [1]. Mathematical models used to fit the drug release profiles include the zero-order with  $T_{\text{lag}}$ , Logistic 1, Logistic 2 and Gompertz 1. The equations were as follows:

$$\text{Zero-order with } T_{\text{lag}}: F = k_0 \cdot (t - T_{\text{lag}});$$

$$\text{Logistic 1: } F = 100 \cdot \frac{e^{\alpha + \beta \cdot \log t}}{1 + e^{\alpha + \beta \cdot \log t}};$$

$$\text{Logistic 2: } F = F_{\text{max}} \cdot \frac{e^{\alpha + \beta \cdot \log t}}{1 + e^{\alpha + \beta \cdot \log t}};$$

$$\text{Gompertz 1: } F = 100 \cdot e^{-\alpha \cdot e^{-\beta \cdot \log t}}$$

Where  $T_{\text{lag}}$  was the lag time prior to drug release,  $k_0$  was the zero-order release constant,  $\alpha$  was the scale factor in Logistic 1 and 2, Gompertz 1 and 2 models,  $\beta$  was the shape factor in Logistic 1 and 2, Gompertz 1 and 2 models,  $F_{\text{max}}$  was the maximum fraction of the drug released at infinite time.

After selecting the optimal drug dissolution model, the time ( $T_{50}$  and  $T_{90}$ ) when F reached 50% and 90% were calculated, respectively. The unit was uniformly converted to days. The selected drug dissolution models and statistical criteria are shown in **Table S4**.

**Table S4. The goodness of fit of the model for drug release profiles of anti-PCO DDS**

| <b>References<sup>a</sup></b> | <b>Drug Dissolution Models</b>   | <b>Statistical Criteria</b>                                                                   |
|-------------------------------|----------------------------------|-----------------------------------------------------------------------------------------------|
| [2]                           | Logistic 1                       | $R^2$ 0.9432; $R^2_{\text{adjusted}}$ 0.9337; MSE: 1.4910;<br>AIC: 21.5295; MSC: 2.3683       |
| [3]                           | /                                | /                                                                                             |
| [4]                           | Logistic 1                       | $R^2$ 0.9884; $R^2_{\text{adjusted}}$ 0.9873; MSE: 1.9926;<br>AIC: 39.9040; MSC: 4.1269       |
| [5]                           | Logistic 1                       | $R^2$ : 0.9822; $R^2_{\text{adjusted}}$ : 0.9804; MSE: 17.9234; AIC:<br>66.2643; MSC: 3.6946  |
| [6]                           | Gompertz 1                       | $R^2$ : 0.9584; $R^2_{\text{adjusted}}$ : 0.9584; MSE: 0.2248;<br>AIC: 15.7712; MSC: 2.8722   |
| [7]                           | Logistic 1                       | $R^2$ : 0.9905; $R^2_{\text{adjusted}}$ : 0.9893; MSE: 12.5206; AIC:<br>50.0682; MSC: 4.2536  |
| [8]                           | Logistic 2                       | $R^2$ : 0.9903; $R^2_{\text{adjusted}}$ : 0.9871; MSE: 11.6764; AIC:<br>44.2439; MSC: 3.9695  |
| [9]                           | Zero-order with $T_{\text{lag}}$ | $R^2$ : 0.9677; $R^2_{\text{adjusted}}$ : 0.9657; MSE: 5.9742;<br>AIC: 86.0807; MSC: 3.2119   |
| [10]                          | Logistic 1                       | $R^2$ : 0.9458; $R^2_{\text{adjusted}}$ : 0.9439; MSE: 74.8207; AIC:<br>233.4190; MSC: 2.7824 |
| [11]                          | Gompertz 1                       | $R^2$ : 0.9837; $R^2_{\text{adjusted}}$ : 0.9822; MSE: 0.0980;<br>AIC: 4.9776; MSC: 3.8068    |
| [12]                          | Gompertz 1                       | $R^2$ : 0.9459; $R^2_{\text{adjusted}}$ : 0.9351; MSE: 18.2460; AIC:<br>35.5937; MSC: 2.3461  |
| [13]                          | /                                | /                                                                                             |
| [14]                          | /                                | /                                                                                             |
| [15]                          | Zero-order with $T_{\text{lag}}$ | $R^2$ : 0.9639; $R^2_{\text{adjusted}}$ : 0.9518; MSE: 8.0458;<br>AIC: 19.9188; MSC: 2.5201   |

|      |            |                                                                                                                |
|------|------------|----------------------------------------------------------------------------------------------------------------|
| [16] | Logistic 2 | Moxifloxacin:<br>$R^2$ : 0.9969; $R^2_{\text{adjusted}}$ : 0.9962; MSE: 4.9608;<br>AIC: 46.4910; MSC: 5.2411   |
|      | Logistic 1 | Dexamethasone:<br>$R^2$ : 0.9904; $R^2_{\text{adjusted}}$ : 0.9897; MSE: 10.9108; AIC:<br>78.3205; MSC: 4.3835 |
|      | Logistic 1 | Genistein:<br>$R^2$ : 0.9986; $R^2_{\text{adjusted}}$ : 0.9968; MSE: 1.0821;<br>AIC: 43.6580; MSC: 5.5412      |
| [17] | Logistic 2 | $R^2$ : 0.9425; $R^2_{\text{adjusted}}$ : 0.9137; MSE: 54.2423; AIC:<br>43.6583; MSC: 1.9988                   |

<sup>a</sup> Reference [3]: the drug release profile was periodically triggered by the NIR and exhibited the stair shape. The model was not available in DDSolver; references[13] and [14]: the drug release F cannot be obtained due to insufficient information of drug loading content.

## References

1. Zhang, Y.; Huo, M.; Zhou, J.; Zou, A.; Li, W.; Yao, C.; Xie, S. DDSolver: an add-in program for modeling and comparison of drug dissolution profiles. *AAPS J* **2010**, *12*, 263-271, doi:10.1208/s12248-010-9185-1.
2. Mao, Y.Y.; Li, M.; Wang, J.D.; Wang, K.J.; Zhang, J.S.; Chen, S.Y.; Liu, X.; Liang, Q.F.; Gao, F.; Wan, X.H. NIR-triggered drug delivery system for chemophotothermal therapy of posterior capsule opacification. *J Control Release* **2021**, *339*, 391-402, doi:10.1016/j.jconrel.2021.09.030.
3. Ye, Z.; Huang, Y.; Li, J.; Ma, T.; Gao, L.; Hu, H.; He, Q.; Jin, H.; Li, Z. Two-dimensional ultrathin Ti(3)C(2) MXene nanosheets coated intraocular lens for synergistic photothermal and NIR-controllable rapamycin releasing therapy against posterior capsule opacification. *Front Bioeng Biotechnol* **2022**, *10*, 989099, doi:10.3389/fbioe.2022.989099.
4. Zhu, S.; Huang, H.; Liu, D.; Wen, S.; Shen, L.; Lin, Q. Augmented cellular uptake and homologous targeting of exosome-based drug loaded IOL for posterior capsular opacification prevention and biosafety improvement. *Bioact Mater* **2022**, *15*, 469-481, doi:10.1016/j.bioactmat.2022.02.019.
5. Huang, X.; Wang, Y.; Cai, J.P.; Ma, X.Y.; Li, Y.; Cheng, J.W.; Wei, R.L. Sustained release of 5-fluorouracil from chitosan nanoparticles surface modified intraocular lens to prevent posterior capsule opacification: an in vitro and in vivo study. *J. Ocular Pharmacol. Ther.* **2013**, *29*, 208-215, doi:10.1089/jop.2012.0184.
6. Han, Y.M.; Tang, J.M.; Xia, J.Y.; Wang, R.; Qin, C.; Liu, S.H.; Zhao, X.; Chen, H.; Lin, Q.K. Anti-adhesive and antiproliferative synergistic surface modification of intraocular lens for reduced posterior capsular opacification. *Int J Nanomedicine* **2019**, *14*, 9047-9061, doi:10.2147/ijn.s215802.
7. Zhang, X.; Lai, K.; Li, S.; Wang, J.; Li, J.; Wang, W.; Ni, S.; Lu, B.; Grzybowski, A.; Ji, J.; et al. Drug-eluting intraocular lens with sustained bromfenac release for conquering posterior capsular opacification. *Bioact Mater* **2022**, *9*, 343-357, doi:10.1016/j.bioactmat.2021.07.015.
8. Zhang, X.; Wang, J.; Xu, J.; Xu, W.; Zhang, Y.; Luo, C.; Ni, S.; Han, H.; Shentu, X.; Ye, J.; et al. Prophylaxis of posterior capsule opacification through

- autophagy activation with indomethacin-eluting intraocular lens. *Bioact Mater* **2023**, 23, 539-550, doi:10.1016/j.bioactmat.2022.11.024.
9. Lu, D.; Han, Y.; Liu, D.; Chen, S.; Qie, J.; Qu, J.; Lin, Q. Centrifugally concentric ring-patterned drug-loaded polymeric coating as an intraocular lens surface modification for efficient prevention of posterior capsular opacification. *Acta Biomater* **2022**, 138, 327-341, doi:10.1016/j.actbio.2021.11.018.
  10. Ongkasin, K.; Masmoudi, Y.; Wertheimer, C.M.; Hillenmayer, A.; Eibl-Lindner, K.H.; Badens, E. Supercritical fluid technology for the development of innovative ophthalmic medical devices: drug loaded intraocular lenses to mitigate posterior capsule opacification. *Eur J Pharm Biopharm* **2020**, 149, 248-256, doi:10.1016/j.ejpb.2020.02.011.
  11. Xia, J.; Lu, D.; Han, Y.; Wang, J.; Hong, Y.; Zhao, P.; Fang, Q.; Lin, Q. Facile multifunctional IOL surface modification via poly(PEGMA-co-GMA) grafting for posterior capsular opacification inhibition. *RSC Adv* **2021**, 11, 9840-9848, doi:10.1039/d1ra00201e.
  12. Liu, S.; Zhao, X.; Tang, J.; Han, Y.; Lin, Q. Drug-eluting hydrophilic coating modification of intraocular lens via facile dopamine self-polymerization for posterior capsular opacification prevention. *ACS Biomater Sci Eng* **2021**, 7, 1065-1073, doi:10.1021/acsbiomaterials.0c01705.
  13. Topete, A.; Tang, J.; Ding, X.; Filipe, H.P.; Saraiva, J.A.; Serro, A.P.; Lin, Q.; Saramago, B. Dual drug delivery from hydrophobic and hydrophilic intraocular lenses: in-vitro and in-vivo studies. *J Control Release* **2020**, 326, 245-255, doi:10.1016/j.jconrel.2020.07.020.
  14. Lei, M.; Peng, Z.; Dong, Q.; He, Y.; Zhang, Z.; Zhang, X.; Yan, M.; Zhao, C. A novel capsular tension ring as local sustained-release carrier for preventing posterior capsule opacification. *Biomaterials* **2016**, 89, 148-156, doi:10.1016/j.biomaterials.2016.02.038.
  15. Chennamaneni, S.R.; Mamalis, C.; Archer, B.; Oakey, Z.; Ambati, B.K. Development of a novel bioerodible dexamethasone implant for uveitis and postoperative cataract inflammation. *J Control Release* **2013**, 167, 53-59.

16. Yan, T.Y.; Ma, Z.X.; Liu, J.J.; Yin, N.; Lei, S.Z.; Zhang, X.X.; Li, X.D.; Zhang, Y.; Kong, J. Thermoresponsive genisteinNLC-dexamethasone-moxifloxacin multi drug delivery system in lens capsule bag to prevent complications after cataract surgery. *Sci Rep* **2021**, *11*, 13, doi:10.1038/s41598-020-80476-x.
17. Guha, R.; Chowdhury, S.; Palui, H.; Mishra, A.; Basak, S.; Mandal, T.K.; Hazra, S.; Konar, A. Doxorubicin-loaded MePEG-PCL nanoparticles for prevention of posterior capsular opacification. *Nanomedicine (Lond)* **2013**, *8*, 1415-1428, doi:10.2217/nnm.12.175.
